# Supplementary material for: Identification of the Calmodulin-Binding Domains of Fas Death Receptor
Source: PLOS journal article supplement (doi:10.1371/journal.pone.0146493), 2016-01-06
Supplement: S2 (10.1371/journal.pone.0146493.s002) [file journal.pone.0146493.s002]

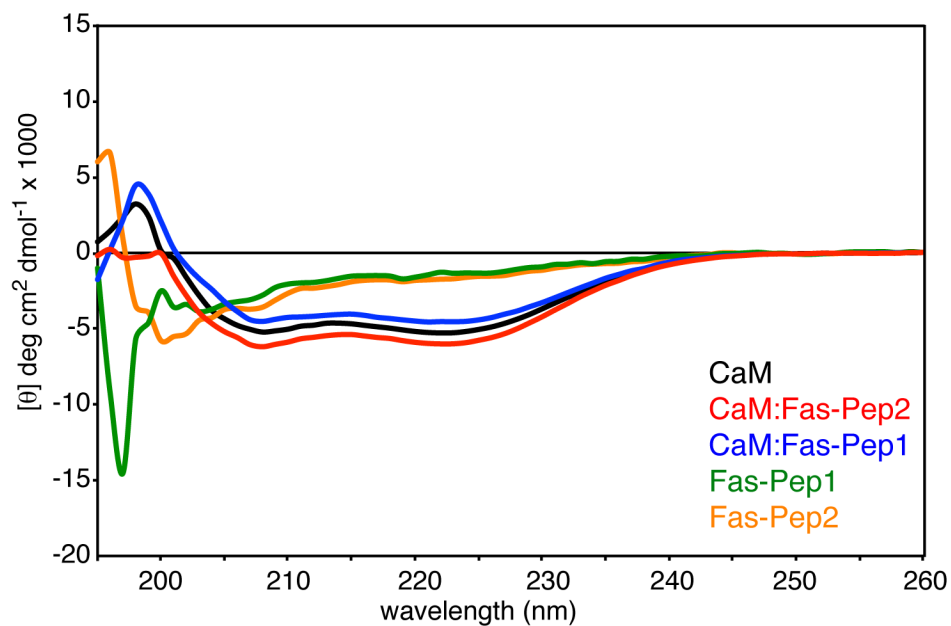

**Figure S2.** Far-UV CD spectra obtained for FasDD peptides,  $\text{Ca}^{2+}/\text{CaM}$  and their complexes. The CD spectra of the free peptides display a negative band at  $\sim 200$  nm consistent with a random coil whereas that of the  $\text{Ca}^{2+}/\text{CaM}$  protein shows two minima at 208 and 222 nm, consistent with an  $\alpha$ -helical structure. The CD spectra of the complexes are similar to those of  $\text{Ca}^{2+}/\text{CaM}$  with features distinctive of an  $\alpha$ -helical type.
