# Supplementary material for: Identification of the Calmodulin-Binding Domains of Fas Death Receptor
Source: PLOS journal article supplement (doi:10.1371/journal.pone.0146493), 2016-01-06
Supplement: S4 (10.1371/journal.pone.0146493.s004) [file journal.pone.0146493.s004]

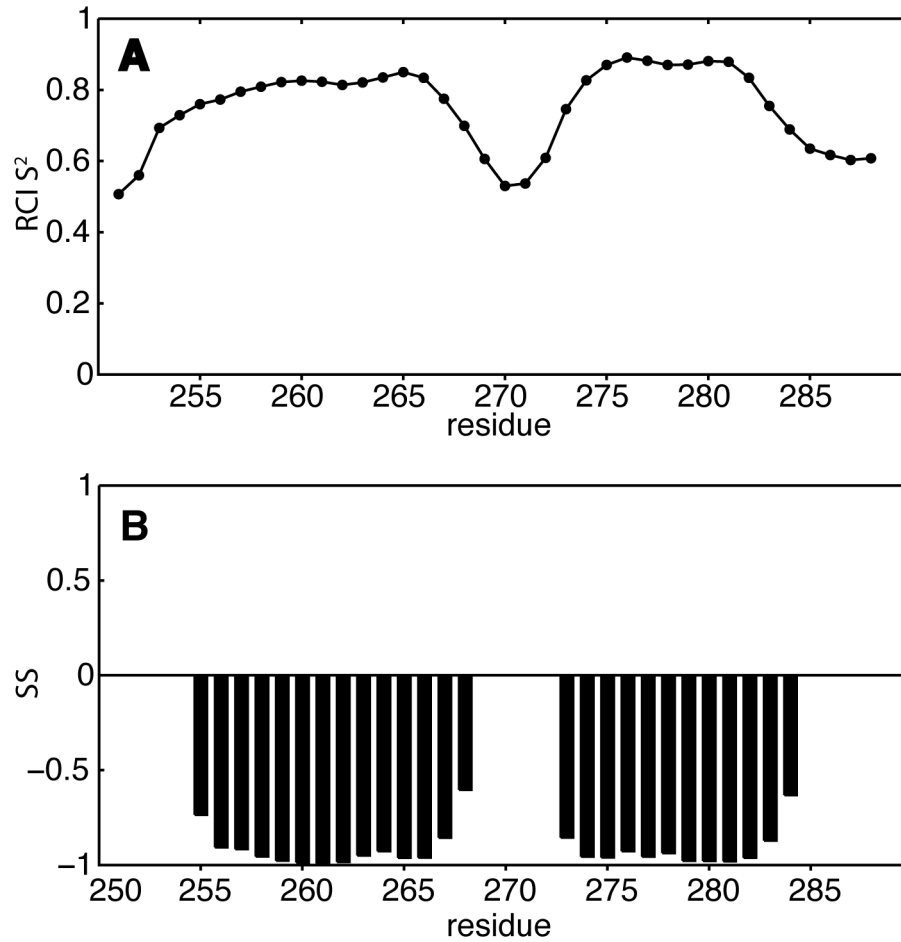

**Fig S4.** TALOS+ secondary structure prediction for Fas-Pep2 in complex with  $\text{Ca}^{2+}$ /CaM. (A) Random coil index (RCI)-derived order parameters and (B) the probability of secondary structure (positive values are obtained for extended structure, negative for  $\alpha$ -helix) plotted for Fas-Pep2 residues. Only secondary structure probabilities  $|\text{SS}| > 0.5$  are shown.
